# Supplementary material
Source: HighWire-hosted journal article supplement (https://erj.ersjournals.com/content/60/5/2101469)

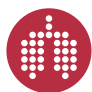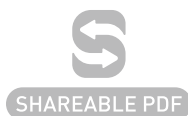

# Plasma cell but not CD20-mediated B-cell depletion protects from bleomycin-induced lung fibrosis

Cecilia M. Prêle<sup>1,2,12</sup>, Tylah Miles<sup>1,12</sup>, David R. Pearce<sup>3</sup>, Robert J. O'Donoghue<sup>4</sup>, Chris Grainge<sup>5,6</sup>, Lucy Barrett<sup>1</sup>, Kimberly Birnie<sup>1</sup>, Andrew D. Lucas<sup>1</sup>, Svetlana Baltic<sup>1</sup>, Matthias Ernst<sup>7</sup>, Catherine Rinaldi<sup>8</sup>, Geoffrey J. Laurent<sup>1,2</sup>, Darryl A. Knight<sup>9</sup>, Mark Fear<sup>1,10</sup>, Gerard Hoyne<sup>1,11</sup>, Robin J. McNulty<sup>3,13</sup> and Steven E. Mutsaers<sup>1,2,13</sup>

<sup>1</sup>Institute for Respiratory Health, The University of Western Australia, Nedlands, Australia. <sup>2</sup>Centre for Cell Therapy and Regenerative Medicine, School of Biomedical Sciences, The University of Western Australia, Nedlands, Australia. <sup>3</sup>Centre for Inflammation and Tissue Repair, Division of Medicine, University College London, London, UK. <sup>4</sup>Department of Pharmacology and Therapeutics, University of Melbourne, Melbourne, Australia. <sup>5</sup>Centre for Healthy Lungs, Hunter Medical Research Institute, University of Newcastle, Newcastle, Australia. <sup>6</sup>Department of Respiratory and Sleep Medicine, John Hunter Hospital, Newcastle, Australia. <sup>7</sup>Olivia Newton John Cancer Research Institute and La Trobe University School of Cancer Medicine, Heidelberg, Australia. <sup>8</sup>Centre for Microscopy Characterisation and Analysis, The University of Western Australia, Nedlands, Australia. <sup>9</sup>Providence Health Care Research Institute, Vancouver, BC, Canada. <sup>10</sup>Burn Injury Research Unit, School of Biomedical Sciences, The University of Western Australia, Nedlands, Australia. <sup>11</sup>The University of Notre Dame Australia, Fremantle, Australia. <sup>12</sup>C.M. Prêle and T. Miles have contributed equally to this work and share first authorship. <sup>13</sup>S.E. Mutsaers and R.J. McNulty have contributed equally to this work and share senior authorship.

Corresponding author: Steven E. Mutsaers ([steven.mutsaers@uwa.edu.au](mailto:steven.mutsaers@uwa.edu.au))

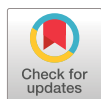

Shareable abstract (@ERSpublications)

**Bortezomib-mediated depletion of plasma cells but not anti-CD20-mediated B-cell depletion inhibited bleomycin-induced lung fibrosis, suggesting that plasma cells are a therapeutic target for fibrotic lung disease such as IPF.** <https://bit.ly/3Nv4w5P>

**Cite this article as:** Prêle CM, Miles T, Pearce DR, *et al.* Plasma cell but not CD20-mediated B-cell depletion protects from bleomycin-induced lung fibrosis. *Eur Respir J* 2022; 60: 2101469 [DOI: 10.1183/13993003.01469-2021].

This single-page version can be shared freely online.

Copyright ©The authors 2022.

This version is distributed under the terms of the Creative Commons Attribution Non-Commercial Licence 4.0. For commercial reproduction rights and permissions contact [permissions@ersnet.org](mailto:permissions@ersnet.org)

This article has an editorial commentary: <https://doi.org/10.1183/13993003.01748-2021>

Received: 30 May 2021  
Accepted: 16 May 2022

## Abstract

Idiopathic pulmonary fibrosis (IPF) is an interstitial lung disease associated with chronic inflammation and tissue remodelling leading to fibrosis, reduced pulmonary function, respiratory failure and death. Bleomycin (Blm)-induced lung fibrosis in mice replicates several clinical features of human IPF, including prominent lymphoid aggregates of predominantly B-cells that accumulate in the lung adjacent to areas of active fibrosis. We have shown previously a requirement for B-cells in the development of Blm-induced lung fibrosis in mice. To determine the therapeutic potential of inhibiting B-cell function in pulmonary fibrosis, we examined the effects of anti-CD20 B-cell ablation therapy to selectively remove mature B-cells from the immune system and inhibit Blm-induced lung fibrosis. Anti-CD20 B-cell ablation did not reduce fibrosis in this model; however, immune phenotyping of peripheral blood and lung resident cells revealed that anti-CD20-treated mice retained a high frequency of CD19<sup>+</sup> CD138<sup>+</sup> plasma cells. Interestingly, high levels of CD138<sup>+</sup> cells were also identified in the lung tissue of patients with IPF, consistent with the mouse model. Treatment of mice with bortezomib, which depletes plasma cells, reduced the level of Blm-induced lung fibrosis, implicating plasma cells as important effector cells in the development and progression of pulmonary fibrosis.

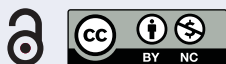

Supplement: inline-supplementary-material-6 [file inline-supplementary-material-6.pdf]
