# Supplementary material
Source: HighWire-hosted journal article supplement (https://erj.ersjournals.com/content/60/5/2101469)
Supplement: inline-supplementary-material-2 [file inline-supplementary-material-2.pdf]

**Supplementary Table S1**

| <b>B Cell Panel – FACS Antibodies</b> |                      |                     |             |               |                         |                                    |
|---------------------------------------|----------------------|---------------------|-------------|---------------|-------------------------|------------------------------------|
| <b>Marker</b>                         | <b>Cell type</b>     | <b>Fluorochrome</b> | <b>Conc</b> | <b>Filter</b> | <b>Catalogue Number</b> | <b>Manufacturer</b>                |
| CD19                                  | B cell               | BUV395              | 4 µg/mL     | 355/379       | 563557                  | BD Horizon™<br>(Franklin Lakes,NJ) |
| CD3e                                  | T cell               | BV421               | 4 µg/mL     | 405/450       | 145-2C11                | BD Horizon™                        |
| CD5                                   | Breg                 | APC R700            | 1 µg/mL     | 640/730       | 565505                  | BD Horizon™                        |
| CD27                                  | Activation<br>marker | BV650               | 1 µg/mL     | 405/670       | 740491                  | BD OptiBuild™                      |
| CD20                                  | B cell               | PE                  | 4 µg/mL     | 561/682       | 4287892                 | eBioscience                        |
| CD45.2                                | Total leukocyte      | PerCP Cy 55         | 4 µg/mL     | 488/695       | 561096                  | BD Pharmingen™                     |
| CD38                                  | Activation<br>marker | FITC                | 2 µg/mL     | 488/530       | 558813                  | BD Pharmingen™                     |
| CD138                                 | Plasma cell          | BB515               | 4 µg/mL     | 405/525       | 564511                  | BD Horizon™                        |
| CD268                                 | BAFF-R               | BV711               | 1 µg/mL     | 405/710       | 742869                  | BD OptiBuild™                      |
